# Supplementary material for: Replacement of Vitamin E by an Extract from an Olive Oil by-Product, Rich in Hydroxytyrosol, in Broiler Diets: Effects on Liver Traits, Oxidation, Lipid Profile, and Transcriptome
Source: MDPI journal article supplement (doi:10.3390/antiox12091751), 2023-09-12
Supplement: s1 [file s1]

**Table S1.** Characteristics of gene-specific primers used for qPCR validation of microarray data <sup>1</sup>.

| Gene                   | Forward (5' to 3')<br>Reverse (5' to 3')       | Annealing<br>temperature<br>(°C) | PCR<br>product<br>size<br>(bp) | NCBI GenBank<br>accession no. | Slope | R <sup>2</sup> | E    |
|------------------------|------------------------------------------------|----------------------------------|--------------------------------|-------------------------------|-------|----------------|------|
| <i>Reference genes</i> |                                                |                                  |                                |                               |       |                |      |
| <i>GAPDH</i>           | ACTGTCAAGGCTGAGAACGG<br>AGCTGAGGGAGCTGAGATGA   | 60                               | 204                            | NM_204305.1                   | -3.49 | 0.997          | 1.93 |
| <i>SDHA</i>            | ATCCCCGTTTTGCCTACGGT<br>GGGAGTTTGCTCCAAGACGA   | 60                               | 172                            | NM_001277398.1                | -3.32 | 0.985          | 2.00 |
| <i>ACTB</i>            | ATGAAGCCCAGAGCAAAAAGA<br>GGGGTGTGAAGGTCTCAAA   | 60                               | 223                            | NM_205518.1                   | -3.43 | 0.998          | 1.96 |
| <i>HPRT1</i>           | CAGCCCCTGCATCGTGATTG<br>GTGTCCTCCCATGCCCTTCA   | 60                               | 169                            | NM_204848.1                   | -2.97 | 0.987          | 2.17 |
| <i>Target genes</i>    |                                                |                                  |                                |                               |       |                |      |
| <i>ANGPTL4</i>         | GCTTCAGCCACACCAACCAG<br>ATCACCGTCCAGCCACCTTC   | 60                               | 190                            | XM_001232283.7                | -3.22 | 0.995          | 2.05 |
| <i>ACSBG2</i>          | CGTTCGACGCTTGCAGATCC<br>CAGGACGTGAAGAGGACGCT   | 60                               | 199                            | NM_001397597.1                | -3.29 | 0.999          | 2.01 |
| <i>HOOK1</i>           | AGCTGAATCCAGCATCAGCAG<br>CTGGAGCGTTAGGCTCTTGTT | 60                               | 164                            | NM_001006542.2                | -3.71 | 0.992          | 1.86 |
| <i>NR0B1</i>           | GGGCTTCCTGGCTAAGTGCT<br>GGCCAGGTAGATCCGGGTTG   | 60                               | 95                             | NM_204593.2                   | -3.25 | 0.994          | 2.03 |
| <i>TACC3</i>           | CAGATCGTGTTGCGGGTCTG<br>AAAGCCACACTCTTCCGCTG   | 60                               | 110                            | NM_001004429.4                | -2.92 | 0.992          | 2.2  |
| <i>GLCC1</i>           | CCGGTGTACAGAGTGGACAGG<br>CGATGCTGAGCGCTGATGTG  | 60                               | 225                            | NM_001012855.5                | -3.44 | 0.995          | 1.95 |
| <i>CCNB1</i>           | GTTTGTGTAGAGCGGCGCAA<br>GCCAGGTCCTTTCGTAGCCT   | 60                               | 249                            | NM_001004369.2                | -3.55 | 0.986          | 1.91 |
| <i>TOP2A</i>           | ATGATGCTGCCATCACCTG<br>GGCCTGGCTTCAAACCATCA    | 60                               | 243                            | NM_204791.3                   | -3.99 | 0.974          | 1.78 |
| <i>CDK1</i>            | AGGCCAAGTGTTGCAATGAA<br>GGTACAGCCTTGCATCCTGC   | 60                               | 155                            | NM_205314.2                   | -3.43 | 0.998          | 1.96 |
| <i>SMC2</i>            | CCCTTAGTGGAGGTGCAAGC<br>TCTCCCACTGCTGCTTCAGA   | 60                               | 177                            | NM_205230.2                   | -3.4  | 0.999          | 1.97 |

<sup>1</sup> GAPDH, glyceraldehyde-3-phosphate dehydrogenase; SDHA, dehydrogenase complex flavoprotein subunit A; ACTB, actin, beta; HPRT1, hypoxanthine phosphoribosyltransferase 1; ANGPTL4, Angiopoyetin-like 4; ACSBG2, acyl-CoA synthetase bubblegum family member 2; HOOK1, hook microtubule tethering protein 1; NR0B1, nuclear receptor subfamily 0 group B member 1; TACC3, transforming acidic coiled-coil containing protein 3; GLCC1, glucocorticoid induced 1; CCNB1, cyclin B1; TOP2A, otopoisomerase (DNA) II alpha; CDK1, cyclin dependent kinase 1; SMC2, structural maintenance of chromosomes 2.

**Table S2.** Description of the up-regulated, down-regulated and total regulated transcripts between HT7.5 vs. HT0, HT15 vs. HT0, HT22.5 vs. HT0, HT30 vs. HT0 groups<sup>1</sup>.

| Comparison     | Up-regulated transcripts | Down-regulated transcripts | Total regulated transcripts |
|----------------|--------------------------|----------------------------|-----------------------------|
| HT7.5 vs. HT0  | 14                       | 19                         | 33                          |
| HT15 vs. HT0   | 118                      | 260                        | 389                         |
| HT22.5 vs. HT0 | 54                       | 22                         | 76                          |
| HT30 vs. HT0   | 57                       | 60                         | 117                         |

**Table S3.** Fold change and *p*-value of all differentially expressed transcripts among HT15 and HT0 group <sup>1</sup>.

| Gene Symbol          | Gene Description                                                     | FC    | <i>p</i> -value |
|----------------------|----------------------------------------------------------------------|-------|-----------------|
| <i>Downregulated</i> |                                                                      |       |                 |
| ANGPTL4              | angiopoietin-like 4                                                  | -2.71 | 0.013           |
| LOC100859636         | RING finger protein 170-like                                         | -2.23 | 0.007           |
| GRIN2A               | glutamate receptor, ionotropic, N-methyl D-aspartate 2A              | -2.09 | 0.025           |
| MIR34B               | microRNA 34b                                                         | -1.93 | 0.011           |
| MIR30B               | microRNA 30b                                                         | -1.87 | 0.023           |
| ACSBG2               | acyl-CoA synthetase bubblegum family member 2                        | -1.84 | 0.031           |
| MIR135A-3            | microRNA mir-135a-3                                                  | -1.73 | 0.004           |
| WDPCP                | WD repeat containing planar cell polarity effector                   | -1.72 | 0.025           |
| LOC418086            | uncharacterized LOC418086                                            | -1.71 | 0.007           |
| ADPRHL1              | ADP-ribosylhydrolase like 1                                          | -1.70 | 0.001           |
| CCDC172              | coiled-coil domain containing 172                                    | -1.68 | 0.015           |
| NR0B1                | nuclear receptor subfamily 0, group B, member 1                      | -1.68 | 0.024           |
| MIR1680              | microRNA mir-1680                                                    | -1.67 | 0.002           |
| HOOK1                | hook microtubule-tethering protein 1                                 | -1.67 | 0.013           |
| MIR1779              | microRNA mir-1779                                                    | -1.66 | 0.022           |
| G0S2                 | G0/G1 switch 2                                                       | -1.64 | 0.022           |
| MIR1655              | microRNA mir-1655                                                    | -1.63 | 0.012           |
| MIR135A2             | microRNA 135a-2                                                      | -1.62 | 0.014           |
| GUCA1C               | guanylate cyclase activator 1C                                       | -1.61 | 0.002           |
| CYP2J6L3             | cytochrome P450 2J6-like 3                                           | -1.59 | 0.014           |
| MIR551B              | microRNA 551b                                                        | -1.58 | 0.031           |
| MIR17                | microRNA 17                                                          | -1.56 | 0.048           |
| C5H14ORF38           | chromosome 5 open reading frame, human C14orf38                      | -1.56 | 0.022           |
| VIP                  | vasoactive intestinal peptide                                        | -1.56 | 0.005           |
| TH                   | tyrosine hydroxylase                                                 | -1.56 | 0.000           |
| LOC771537            | uncharacterized LOC771537                                            | -1.54 | 0.014           |
| CLEC3A               | C-type lectin domain family 3, member A                              | -1.54 | 0.003           |
| C5H14ORF38           | chromosome 5 open reading frame, human C14orf38                      | -1.53 | 0.039           |
| GRIA3                | glutamate receptor, ionotropic, AMPA 3                               | -1.52 | 0.005           |
| HS3ST5               | heparan sulfate (glucosamine) 3-O-sulfotransferase 5                 | -1.51 | 0.013           |
| ATOH7                | atonal bHLH transcription factor 7                                   | -1.51 | 0.011           |
| PACRGL               | PARK2 co-regulated-like                                              | -1.51 | 0.022           |
| LOC770479            | gamma-aminobutyric acid receptor subunit beta-1-like                 | -1.51 | 0.037           |
| MIR1718              | microRNA mir-1718                                                    | -1.51 | 0.012           |
| SLC32A1              | solute carrier family 32 (GABA vesicular transporter), member 1      | -1.51 | 0.015           |
| PTPRQ                | protein tyrosine phosphatase, receptor type, Q                       | -1.50 | 0.043           |
| C8ORF34              | chromosome 2 open reading frame, human C8orf34                       | -1.50 | 0.017           |
| BRINP1               | bone morphogenetic protein/retinoic acid inducible neural-specific 1 | -1.49 | 0.015           |
| DISP2                | dispatched homolog 2 (Drosophila)                                    | -1.49 | 0.000           |

| Gene Symbol  | Gene Description                                                     | FC    | p-value |
|--------------|----------------------------------------------------------------------|-------|---------|
| CALML3       | calmodulin-like 3                                                    | -1.49 | 0.035   |
| TCP10        | t-complex 10                                                         | -1.49 | 0.014   |
| FGF13        | fibroblast growth factor 13                                          | -1.49 | 0.020   |
| BOLL         | boule-like RNA-binding protein                                       | -1.49 | 0.002   |
| KCNH7        | potassium voltage-gated channel, subfamily H (eag-related), member 7 | -1.48 | 0.028   |
| MIR128-2     | microRNA 128-2                                                       | -1.48 | 0.024   |
| MIR1722      | microRNA mir-1722                                                    | -1.48 | 0.025   |
| LOC769098    | uncharacterized LOC769098                                            | -1.48 | 0.012   |
| NMS          | neuromedin S                                                         | -1.48 | 0.030   |
| CHRNA6       | cholinergic receptor, nicotinic, alpha 6 (neuronal)                  | -1.47 | 0.002   |
| ANO4         | anoctamin 4                                                          | -1.47 | 0.012   |
| MIR762       | microRNA mir-762                                                     | -1.47 | 0.041   |
| SOSTDC1      | sclerostin domain containing 1                                       | -1.46 | 0.012   |
| CALR3        | calreticulin 3                                                       | -1.46 | 0.012   |
| TMEM240      | transmembrane protein 240                                            | -1.46 | 0.032   |
| MIR1592      | microRNA mir-1592                                                    | -1.46 | 0.021   |
| NCAM2        | neural cell adhesion molecule 2                                      | -1.45 | 0.017   |
| MIR1799      | microRNA mir-1799                                                    | -1.45 | 0.017   |
| MIR1598      | microRNA mir-1598                                                    | -1.45 | 0.002   |
| LOC101748624 | uncharacterized LOC101748624                                         | -1.45 | 0.013   |
| MSLN         | mesothelin-like                                                      | -1.45 | 0.015   |
| KCNQ3        | potassium voltage-gated channel, KQT-like subfamily, member 3        | -1.45 | 0.033   |
| LOC420807    | uncharacterized LOC420807                                            | -1.44 | 0.008   |
| LOC101749601 | translation initiation factor IF-2-like                              | -1.44 | 0.008   |
| MIR1741      | microRNA mir-1741                                                    | -1.44 | 0.020   |
| MIR301B      | microRNA mir-301b                                                    | -1.43 | 0.015   |
| FSTL5        | folistatin-like 5                                                    | -1.43 | 0.005   |
| ELOVL4       | ELOVL fatty acid elongase 4                                          | -1.43 | 0.014   |
| ALG13        | asparagine-linked glycosylation 13 homolog (S. cerevisiae)           | -1.43 | 0.006   |
| MIR106A      | microRNA 106a                                                        | -1.43 | 0.028   |
| MEPE         | matrix extracellular phosphoglycoprotein                             | -1.43 | 0.028   |
| FGF2         | fibroblast growth factor 2 (basic)                                   | -1.42 | 0.004   |
| LOC100857478 | uncharacterized LOC100857478                                         | -1.42 | 0.047   |
| NLGN1        | neuroligin 1                                                         | -1.42 | 0.042   |
| CNGA1        | cyclic nucleotide gated channel alpha 1                              | -1.42 | 0.022   |
| CHRM3        | cholinergic receptor, muscarinic 3                                   | -1.42 | 0.006   |
| MIR1597      | microRNA mir-1597                                                    | -1.42 | 0.008   |
| SKOR2        | SKI family transcriptional corepressor 2                             | -1.42 | 0.043   |
| LOC428499    | carboxymethylenebutenolidase homolog                                 | -1.42 | 0.046   |
| NLGN3        | neuroligin 3                                                         | -1.42 | 0.036   |
| LRRC9        | leucine rich repeat containing 9                                     | -1.41 | 0.023   |
| CHRNA9       | cholinergic receptor, nicotinic, alpha 9 (neuronal)                  | -1.41 | 0.003   |
| PDCL2        | phosducin-like 2                                                     | -1.41 | 0.022   |
| ZP4          | zona pellucida glycoprotein 4                                        | -1.41 | 0.005   |
| LOC422171    | Rho GTPase activating protein 20-like                                | -1.41 | 0.010   |
| FOXP1        | forkhead box G1                                                      | -1.41 | 0.016   |
| LOC423822    | heparan sulfate glucosamine 3-O-sulfotransferase 1-like              | -1.41 | 0.006   |
| LOC101752022 | maestro heat-like repeat-containing protein family member 2B-like    | -1.41 | 0.013   |
| KLHL31       | kelch-like family member 31                                          | -1.41 | 0.002   |
| VGLL1        | vestigial-like family member 1                                       | -1.41 | 0.025   |
| MIR202       | microRNA 202                                                         | -1.41 | 0.014   |
| LOC100857259 | vesicular inhibitory amino acid transporter-like                     | -1.40 | 0.029   |
| C1HXORF59    | chromosome 1 open reading frame, human CXORF59                       | -1.40 | 0.040   |

| Gene Symbol    | Gene Description                                                                       | FC    | p-value |
|----------------|----------------------------------------------------------------------------------------|-------|---------|
| MIR9-1         | microRNA mir-9-1                                                                       | -1.40 | 0.045   |
| LOC420300      | lymphocyte antigen 6E-like                                                             | -1.40 | 0.006   |
| BEGAIN         | brain-enriched guanylate kinase-associated                                             | -1.40 | 0.050   |
| HCN1           | hyperpolarization activated cyclic nucleotide-gated potassium channel 1                | -1.40 | 0.025   |
| GALNTL6        | UDP-N-acetyl-alpha-D-galactosamine:polypeptide N-acetylglactosaminyltransferase-like 6 | -1.40 | 0.017   |
| CXCL14         | chemokine (C-X-C motif) ligand 14                                                      | -1.40 | 0.027   |
| TMEM52B        | transmembrane protein 52B                                                              | -1.40 | 0.002   |
| STK32B         | serine/threonine kinase 32B                                                            | -1.40 | 0.010   |
| MIR19A         | microRNA 19a                                                                           | -1.40 | 0.043   |
| GABRG3         | gamma-aminobutyric acid (GABA) A receptor, gamma 3                                     | -1.40 | 0.033   |
| KIF25          | kinesin family member 25                                                               | -1.39 | 0.010   |
| LOC101749287   | uncharacterized LOC101749287                                                           | -1.39 | 0.041   |
| TPBG           | trophoblast glycoprotein                                                               | -1.39 | 0.025   |
| METAP1D        | methionyl aminopeptidase type 1D (mitochondrial)                                       | -1.39 | 0.016   |
| PHEX           | phosphate regulating endopeptidase homolog, X-linked                                   | -1.39 | 0.017   |
| SCRG1          | stimulator of chondrogenesis 1                                                         | -1.39 | 0.017   |
| WWP1           | WW domain containing E3 ubiquitin protein ligase 1                                     | -1.39 | 0.047   |
| PRSS55         | protease, serine, 55                                                                   | -1.39 | 0.004   |
| LOC101751393   | PHD finger protein 7-like                                                              | -1.39 | 0.032   |
| SERPINB10 CPOX | serpin peptidase inhibitor, clade B (ovalbumin), member 10 CPOX                        | -1.39 | 0.021   |
| STEAP1         | six transmembrane epithelial antigen of the prostate 1                                 | -1.39 | 0.037   |
| AADACL3        | arylacetamide deacetylase-like 4-like                                                  | -1.39 | 0.050   |
| AQP12          | aquaporin 12                                                                           | -1.38 | 0.026   |
| OVST           | ovostatin                                                                              | -1.38 | 0.033   |
| LTB4R          | leukotriene B4 receptor                                                                | -1.38 | 0.038   |
| LOC100859756   | scale keratin-like                                                                     | -1.38 | 0.023   |
| MIR142         | microRNA 142                                                                           | -1.38 | 0.009   |
| KBTBD12        | kelch repeat and BTB (POZ) domain containing 12                                        | -1.38 | 0.001   |
| EGFL6          | EGF-like-domain, multiple 6                                                            | -1.38 | 0.027   |
| CLDN34         | claudin 34                                                                             | -1.38 | 0.038   |
| PII5           | peptidase inhibitor 15                                                                 | -1.38 | 0.045   |
| NTS            | neurotensin                                                                            | -1.38 | 0.014   |
| ATP6V0D2       | ATPase, H <sup>+</sup> transporting, lysosomal 38kDa, V0 subunit d2                    | -1.38 | 0.030   |
| CCDC92         | coiled-coil domain containing 92                                                       | -1.38 | 0.029   |
| LOC428538      | epidermal retinol dehydrogenase 2-like                                                 | -1.38 | 0.001   |
| LOC100857916   | scavenger receptor cysteine-rich type 1 protein M130-like                              | -1.38 | 0.022   |
| RGPD1          | RANBP2-like and GRIP domain containing 1                                               | -1.38 | 0.033   |
| LOC770649      | nucleophosmin-like                                                                     | -1.37 | 0.027   |
| PCTP           | phosphatidylcholine transfer protein                                                   | -1.37 | 0.030   |
| LRTM2          | leucine-rich repeats and transmembrane domains 2                                       | -1.37 | 0.014   |
| GCM2           | glial cells missing homolog 2 (Drosophila)                                             | -1.37 | 0.029   |
| DLX5           | distal-less homeobox 5                                                                 | -1.37 | 0.021   |
| TAL2           | T-cell acute lymphocytic leukemia 2                                                    | -1.37 | 0.016   |
| FAM172BP       | family with sequence similarity 172, member B, pseudogene                              | -1.37 | 0.017   |
| MIR1462        | microRNA mir-1462                                                                      | -1.37 | 0.047   |
| NEFH           | neurofilament, heavy polypeptide                                                       | -1.37 | 0.036   |
| LIN7A          | lin-7 homolog A (C. elegans)                                                           | -1.37 | 0.050   |
| OC3            | osteocalcin-like protein OC3                                                           | -1.37 | 0.041   |
| GREB1          | growth regulation by estrogen in breast cancer 1                                       | -1.37 | 0.019   |
| EFHC2          | EF-hand domain (C-terminal) containing 2                                               | -1.37 | 0.017   |
| MIR383         | microRNA 383                                                                           | -1.37 | 0.028   |
| LOC771876      | macrophage mannose receptor 1-like                                                     | -1.37 | 0.009   |

| Gene Symbol    | Gene Description                                                    | FC    | p-value |
|----------------|---------------------------------------------------------------------|-------|---------|
| NME8           | NME/NM23 family member 8                                            | -1.37 | 0.006   |
| MIR21          | microRNA 21                                                         | -1.36 | 0.020   |
| CTD-2207O23.12 | Uncharacterized protein [Source:UniProtKB/TrEMBL;Acc:M0QY47]        | -1.36 | 0.026   |
| MIR1570        | microRNA mir-1570                                                   | -1.36 | 0.037   |
| PCYOX1L        | prenylcysteine oxidase 1 like                                       | -1.36 | 0.022   |
| MIR206         | microRNA 206                                                        | -1.36 | 0.048   |
| LOC101748060   | uncharacterized LOC101748060                                        | -1.36 | 0.032   |
| LOC427400      | uncharacterized LOC427400                                           | -1.36 | 0.037   |
| CHRD12         | chordin-like 2                                                      | -1.36 | 0.012   |
| SPAG1          | sperm associated antigen 1                                          | -1.36 | 0.022   |
| LOC424727      | structure-specific endonuclease subunit SLX1-like                   | -1.36 | 0.003   |
| CNTNAP2        | contactin associated protein-like 2                                 | -1.36 | 0.048   |
| LRRC48         | leucine rich repeat containing 48                                   | -1.36 | 0.025   |
| EPHA10         | EPH receptor A10                                                    | -1.36 | 0.020   |
| RSPH9          | radial spoke head 9 homolog (Chlamydomonas)                         | -1.35 | 0.046   |
| RSPH1          | radial spoke head 1 homolog (Chlamydomonas)                         | -1.35 | 0.044   |
| C4H4ORF45      | chromosome 4 open reading frame, human C4orf45                      | -1.35 | 0.024   |
| XG             | Xg blood group                                                      | -1.35 | 0.019   |
| LOC425001      | uncharacterized LOC425001                                           | -1.35 | 0.019   |
| C24H11ORF1     | chromosome 24 open reading frame, human C11orf1                     | -1.35 | 0.041   |
| SH3RF3         | SH3 domain containing ring finger 3                                 | -1.35 | 0.002   |
| CRISP2         | cysteine-rich secretory protein 2                                   | -1.35 | 0.033   |
| KLHL29         | kelch-like family member 29                                         | -1.35 | 0.014   |
| KIAA0319       | KIAA0319                                                            | -1.35 | 0.043   |
| BLVRA          | biliverdin reductase A                                              | -1.35 | 0.008   |
| MIR130B        | microRNA 130b                                                       | -1.35 | 0.024   |
| LOC420156      | perilipin 3-like                                                    | -1.34 | 0.003   |
| MMRN1          | multimerin 1                                                        | -1.34 | 0.026   |
| MYO5C          | myosin VC                                                           | -1.34 | 0.039   |
| ZNF488         | zinc finger protein 488                                             | -1.34 | 0.014   |
| TRIP11         | thyroid hormone receptor interactor 11                              | -1.34 | 0.013   |
| MOV10L1        | Mov10l1, Moloney leukemia virus 10-like 1, homolog (mouse)          | -1.34 | 0.039   |
| RAMP1          | receptor (G protein-coupled) activity modifying protein 1           | -1.34 | 0.030   |
| DMC1           | DNA meiotic recombinase 1                                           | -1.34 | 0.050   |
| TDRD9          | tudor domain containing 9                                           | -1.34 | 0.039   |
| LOC768596      | uncharacterized LOC768596                                           | -1.34 | 0.034   |
| LOC101752049   | uncharacterized LOC101752049                                        | -1.34 | 0.017   |
| MUC2           | mucin 2, oligomeric mucus/gel-forming                               | -1.34 | 0.050   |
| EPYC           | epiphycan                                                           | -1.34 | 0.040   |
| ULK4           | unc-51-like kinase 4 (C. elegans)                                   | -1.34 | 0.017   |
| MMEL1          | membrane metallo-endopeptidase-like 1                               | -1.34 | 0.048   |
| C1ORF146       | chromosome 8 open reading frame, human C1orf146                     | -1.34 | 0.010   |
| MIR1670        | microRNA mir-1670                                                   | -1.34 | 0.036   |
| LOC101749470   | uncharacterized LOC101749470                                        | -1.33 | 0.018   |
| KRT12          | keratin 12 (Meesmann corneal dystrophy)                             | -1.33 | 0.009   |
| MSLN1          | mesothelin-like                                                     | -1.33 | 0.034   |
| RIBC2          | RIB43A domain with coiled-coils 2                                   | -1.33 | 0.011   |
| KCNA5          | potassium voltage-gated channel, shaker-related subfamily, member 5 | -1.33 | 0.046   |
| MIR7-2         | microRNA 7-2                                                        | -1.33 | 0.048   |
| ASB14          | ankyrin repeat and SOCS box containing 14                           | -1.33 | 0.011   |
| MIR1-1         | microRNA 1-1                                                        | -1.33 | 0.039   |
| SRRL           | serine racemase-like                                                | -1.33 | 0.006   |
| CCDC63         | coiled-coil domain containing 63                                    | -1.33 | 0.016   |

| Gene Symbol  | Gene Description                                                           | FC    | p-value |
|--------------|----------------------------------------------------------------------------|-------|---------|
| GKN2         | gastrokine 2                                                               | -1.33 | 0.002   |
| LOC425462    | malignant fibrous histiocytoma-amplified sequence 1 homolog                | -1.33 | 0.017   |
| C10ORF112    | chromosome 2 open reading frame, human C10orf112                           | -1.33 | 0.004   |
| RSPH4A       | radial spoke head 4 homolog A (Chlamydomonas)                              | -1.33 | 0.003   |
| KIAA1456     | KIAA1456                                                                   | -1.33 | 0.021   |
| C6orf58      | chromosome 6 open reading frame 58                                         | -1.32 | 0.014   |
| FAM19A1      | family with sequence similarity 19 (chemokine (C-C motif)-like), member A1 | -1.32 | 0.041   |
| RIPPLY2      | rippy transcriptional repressor 2                                          | -1.32 | 0.040   |
| SHISA6       | shisa homolog 6 (Xenopus laevis)                                           | -1.32 | 0.024   |
| LOC421856    | uncharacterized LOC421856                                                  | -1.32 | 0.032   |
| LOC101751334 | phosphoglucomutase-like protein 5-like                                     | -1.32 | 0.048   |
| FIBCD1       | fibrinogen C domain containing 1                                           | -1.32 | 0.046   |
| LOC423277    | galectin-related protein-like                                              | -1.32 | 0.025   |
| PIGQ         | phosphatidylinositol glycan anchor biosynthesis, class Q                   | -1.32 | 0.043   |
| MIR92A1      | microRNA 92a-1                                                             | -1.32 | 0.008   |
| PAQR9        | progesterin and adipoQ receptor family member IX                           | -1.32 | 0.013   |
| PPP1R3B      | protein phosphatase 1, regulatory subunit 3B                               | -1.32 | 0.029   |
| CCDC83       | coiled-coil domain containing 83                                           | -1.31 | 0.046   |
| ADGB         | androglobin                                                                | -1.31 | 0.006   |
| CRYBB1       | crystallin, beta B1                                                        | -1.31 | 0.032   |
| MIR490       | microRNA 490                                                               | -1.31 | 0.046   |
| KCNJ6        | potassium inwardly-rectifying channel, subfamily J, member 6               | -1.31 | 0.037   |
| AVPR2        | arginine vasopressin receptor 2                                            | -1.31 | 0.005   |
| LOC100858320 | protein eyes shut homolog                                                  | -1.31 | 0.007   |
| MIR429       | microRNA 429                                                               | -1.31 | 0.028   |
| MORN3        | MORN repeat containing 3                                                   | -1.31 | 0.039   |
| COMMD3       | COMM domain containing 3                                                   | -1.31 | 0.003   |
| NHEDC2       | Na <sup>+</sup> /H <sup>+</sup> exchanger domain containing 2              | -1.31 | 0.021   |
| NEK11        | NIMA-related kinase 11                                                     | -1.31 | 0.035   |
| STK17A       | serine/threonine kinase 17a                                                | -1.31 | 0.017   |
| PLIN1        | perilipin 1                                                                | -1.31 | 0.020   |
| LOC100858427 | feather keratin Cos1-1/Cos1-3/Cos2-1-like                                  | -1.31 | 0.015   |
| GGT7         | gamma-glutamyltransferase 7                                                | -1.31 | 0.021   |
| KAZALD1      | Kazal-type serine peptidase inhibitor domain 1                             | -1.31 | 0.014   |
| EBF3         | early B-cell factor 3                                                      | -1.31 | 0.037   |
| CCDC148      | coiled-coil domain containing 148                                          | -1.31 | 0.006   |
| LOC415312    | uncharacterized LOC415312                                                  | -1.31 | 0.024   |
| LOC101748152 | uncharacterized LOC101748152                                               | -1.31 | 0.041   |
| CYP26B1      | cytochrome P450, family 26, subfamily B, polypeptide 1                     | -1.31 | 0.038   |
| NSUN7        | NOP2/Sun domain family, member 7                                           | -1.31 | 0.001   |
| LOC100859545 | potassium channel subfamily K member 9-like                                | -1.31 | 0.048   |
| LOC427778    | ectonucleoside triphosphate diphosphohydrolase 1                           | -1.31 | 0.043   |
| VSTM4        | V-set and transmembrane domain containing 4                                | -1.31 | 0.010   |
| LOC101749925 | uncharacterized LOC101749925                                               | -1.30 | 0.030   |
| LOC101750580 | uncharacterized LOC101750580                                               | -1.30 | 0.037   |
| LOC101748060 | uncharacterized LOC101748060                                               | -1.30 | 0.002   |
| CEP57L1      | centrosomal protein 57kDa-like 1                                           | -1.30 | 0.047   |
| FBXO43       | F-box protein 43                                                           | -1.30 | 0.041   |
| DZANK1       | double zinc ribbon and ankyrin repeat domains 1                            | -1.30 | 0.004   |
| MIR1789      | microRNA mir-1789                                                          | -1.30 | 0.040   |
| TMEM150A     | transmembrane protein 150A                                                 | -1.30 | 0.020   |
| LOC100857840 | disintegrin and metalloproteinase domain-containing protein 21-like        | -1.30 | 0.017   |
| LOC422353    | synaptotagmin-like protein 2-like                                          | -1.30 | 0.021   |

| Gene Symbol        | Gene Description                                                                                  | FC    | p-value |
|--------------------|---------------------------------------------------------------------------------------------------|-------|---------|
| MIR1658            | microRNA mir-1658                                                                                 | -1.30 | 0.034   |
| LOC427491          | C2 calcium-dependent domain containing 4C-like                                                    | -1.30 | 0.048   |
| B3GNTL2            | UDP-GlcNAc:betaGal beta-1,3-N-acetylglucosaminyltransferase-like 2                                | -1.30 | 0.033   |
| PIK3C2G            | phosphatidylinositol-4-phosphate 3-kinase, catalytic subunit type 2 gamma                         | -1.30 | 0.025   |
| SLC5A12            | solute carrier family 5 (sodium/monocarboxylate cotransporter), member 12                         | -1.30 | 0.007   |
| LOC421298          | ankyrin repeat domain-containing protein 9-like                                                   | -1.30 | 0.021   |
| LOC769834          | trophoblast glycoprotein-like                                                                     | -1.30 | 0.037   |
| FYTTD1L            | forty-two-three domain containing 1-like                                                          | -1.30 | 0.017   |
| AGTR1              | angiotensin II receptor, type 1                                                                   | -1.30 | 0.001   |
| KCNH7              | potassium voltage-gated channel, subfamily H (eag-related), member 7                              | -1.30 | 0.024   |
| <i>Upregulated</i> |                                                                                                   |       |         |
| BG2                | intestinal zipper protein                                                                         | 3.75  | 0.010   |
| KPNA2              | karyopherin alpha 2 (RAG cohort 1, importin alpha 1)                                              | 2.58  | 0.018   |
| DDX60              | DEAD (Asp-Glu-Ala-Asp) box polypeptide 60                                                         | 2.28  | 0.047   |
| SMC2               | structural maintenance of chromosomes 2                                                           | 2.23  | 0.035   |
| CDK1               | cyclin-dependent kinase 1                                                                         | 2.08  | 0.038   |
| TOP2A              | topoisomerase (DNA) II alpha 170kDa                                                               | 2.07  | 0.045   |
| ASPM               | asp (abnormal spindle) homolog, microcephaly associated (Drosophila)                              | 1.92  | 0.025   |
| CCNB2              | cyclin B2                                                                                         | 1.88  | 0.038   |
| GLCCI1             | glucocorticoid induced transcript 1                                                               | 1.78  | 0.018   |
| TACC3              | transforming, acidic coiled-coil containing protein 3                                             | 1.70  | 0.021   |
| HIST1H46L2         | histone cluster 1, H4-IV, germinal H4-like 2 (similar to human histone cluster 1, class H4 genes) | 1.68  | 0.013   |
| STMN1              | stathmin 1                                                                                        | 1.67  | 0.021   |
| HIST1H2B7          | histone cluster 1, H2B-VII (similar to human histone cluster 1, class H2B, member N)              | 1.66  | 0.032   |
| HIST1H2B7L2        | histone cluster 1, H2B-VII-like 2 (similar to human histone cluster 1, class H2B, member N)       | 1.66  | 0.032   |
| MOV10              | Mov10, Moloney leukemia virus 10, homolog (mouse)                                                 | 1.64  | 0.036   |
| CRHR2              | corticotropin releasing hormone receptor 2                                                        | 1.64  | 0.036   |
| KIF14              | kinesin family member 14                                                                          | 1.62  | 0.005   |
| IRF8               | interferon regulatory factor 8                                                                    | 1.62  | 0.019   |
| HIST1H2BO          | histone cluster 1, H2bo                                                                           | 1.62  | 0.049   |
| DIAPH3             | diaphanous-related formin 3                                                                       | 1.61  | 0.043   |
| SPP1               | secreted phosphoprotein 1                                                                         | 1.61  | 0.011   |
| ICOS               | inducible T-cell co-stimulator                                                                    | 1.59  | 0.014   |
| NCAPG              | non-SMC condensin I complex, subunit G                                                            | 1.58  | 0.042   |
| SMC4               | structural maintenance of chromosomes 4                                                           | 1.57  | 0.041   |
| HIST1H2A4L2        | histone cluster 1, H2A-IV-like 2 (similar to human histone cluster 2, class H2A, member C)        | 1.57  | 0.035   |
| LOC101749238       | histone H2A-IV-like                                                                               | 1.56  | 0.043   |
| HIST1H2A4L2        | histone cluster 1, H2A-IV-like 2 (similar to human histone cluster 2, class H2A, member C)        | 1.56  | 0.045   |
| HIST1H2A3          | histone cluster 1, H2A, III (similar to human histone cluster 2, class H2A, member C)             | 1.56  | 0.045   |
| RAD51              | RAD51 recombinase                                                                                 | 1.55  | 0.022   |
| HIST1H2A4          | histone cluster 1, H2A, IV (similar to human histone cluster 2, class H2A, member C)              | 1.55  | 0.048   |
| PRPSAP2            | phosphoribosyl pyrophosphate synthetase-associated protein 2                                      | 1.55  | 0.001   |
| TSPAN8             | tetraspanin 8                                                                                     | 1.55  | 0.016   |
| HIST1H2A4L3        | histone cluster 1, H2A-IV-like 3 (similar to human histone cluster 2, class H2A, member C)        | 1.54  | 0.046   |
| KIF23              | kinesin family member 23                                                                          | 1.52  | 0.023   |
| C11ORF34           | chromosome 24 open reading frame, human C11orf34                                                  | 1.52  | 0.008   |
| SNORD12C           | small nucleolar RNA, C/D box 12C                                                                  | 1.51  | 0.005   |
| SLC41A2            | solute carrier family 41, member 2                                                                | 1.50  | 0.032   |

| Gene Symbol  | Gene Description                                                                    | FC   | p-value |
|--------------|-------------------------------------------------------------------------------------|------|---------|
| SIDT1        | SID1 transmembrane family, member 1                                                 | 1.50 | 0.025   |
| DOCK9        | dedicator of cytokinesis 9                                                          | 1.50 | 0.049   |
| PCNA         | proliferating cell nuclear antigen                                                  | 1.49 | 0.037   |
| MIR1596      | microRNA mir-1596                                                                   | 1.49 | 0.040   |
| ACTR3        | ARP3 actin-related protein 3 homolog (yeast)                                        | 1.49 | 0.026   |
| TYMS         | thymidylate synthetase                                                              | 1.47 | 0.050   |
| LOC100858439 | keratin, type I cytoskeletal 14-like                                                | 1.46 | 0.041   |
| USH1C        | Usher syndrome 1C (autosomal recessive, severe)                                     | 1.45 | 0.014   |
| HELLS        | helicase, lymphoid-specific                                                         | 1.44 | 0.044   |
| LGALS8       | lectin, galactoside-binding, soluble, 8                                             | 1.43 | 0.004   |
| SYNGR3       | synaptogyrin 3                                                                      | 1.43 | 0.039   |
| CTD-2370N5.3 | Uncharacterized protein [Source:UniProtKB/TrEMBL;Acc:J3QR06]                        | 1.43 | 0.002   |
| RFK          | riboflavin kinase                                                                   | 1.43 | 0.008   |
| TMEM41B      | transmembrane protein 41B                                                           | 1.43 | 0.019   |
| CERS6        | ceramide synthase 6                                                                 | 1.43 | 0.030   |
| SNORD20      | small nucleolar RNA, C/D box 20                                                     | 1.43 | 0.033   |
| SDC1         | syndecan 1                                                                          | 1.43 | 0.030   |
| ADH6         | alcohol dehydrogenase 6 (class V)                                                   | 1.42 | 0.027   |
| BUB3         | BUB3 mitotic checkpoint protein                                                     | 1.42 | 0.034   |
| MIR199B      | microRNA mir-199b                                                                   | 1.42 | 0.024   |
| HMGB2        | high mobility group box 2                                                           | 1.42 | 0.046   |
| THYN1        | thymocyte nuclear protein 1                                                         | 1.42 | 0.027   |
| DEK          | DEK proto-oncogene                                                                  | 1.41 | 0.008   |
| CERS1        | ceramide synthase 1                                                                 | 1.40 | 0.049   |
| HIST1H11L    | histone cluster 1, H1.11L (similar to human histone cluster 1, class H1 genes)      | 1.40 | 0.038   |
| ACE2         | angiotensin I converting enzyme 2                                                   | 1.40 | 0.033   |
| HN1          | hematological and neurological expressed 1                                          | 1.40 | 0.012   |
| BFAR         | bifunctional apoptosis regulator                                                    | 1.39 | 0.010   |
| LDHA         | lactate dehydrogenase A                                                             | 1.39 | 0.015   |
| DUSP5        | dual specificity phosphatase 5                                                      | 1.39 | 0.023   |
| CAPSL        | calcyphosine-like                                                                   | 1.39 | 0.022   |
| LGALS2       | lectin, galactoside-binding, soluble, 2                                             | 1.39 | 0.024   |
| H2AFZ        | H2A histone family, member Z                                                        | 1.39 | 0.030   |
| PTMA         | prothymosin, alpha                                                                  | 1.39 | 0.047   |
| KCNMA1       | potassium large conductance calcium-activated channel, subfamily M, alpha member 1  | 1.38 | 0.013   |
| DSTN         | destrin (actin depolymerizing factor)                                               | 1.38 | 0.042   |
| PSEN1        | presenilin 1                                                                        | 1.38 | 0.033   |
| HMGN2        | high mobility group nucleosomal binding domain 2                                    | 1.38 | 0.016   |
| SWAP70       | SWAP switching B-cell complex 70kDa subunit                                         | 1.38 | 0.020   |
| SOCs1        | suppressor of cytokine signaling 1                                                  | 1.37 | 0.032   |
| HMGN5        | high mobility group nucleosome binding domain 5                                     | 1.37 | 0.046   |
| RRM1         | ribonucleotide reductase M1                                                         | 1.36 | 0.049   |
| RAD21        | RAD21 cohesin complex component                                                     | 1.36 | 0.036   |
| TRAF3        | TNF receptor-associated factor 3                                                    | 1.35 | 0.032   |
| CDC20        | cell division cycle 20                                                              | 1.35 | 0.009   |
| MRPS18C      | mitochondrial ribosomal protein S18C                                                | 1.35 | 0.031   |
| ACP1         | acid phosphatase 1, soluble                                                         | 1.35 | 0.018   |
| CD82         | CD82 molecule                                                                       | 1.35 | 0.029   |
| PTMS         | parathymosin                                                                        | 1.34 | 0.031   |
| LOC101751423 | uncharacterized LOC101751423                                                        | 1.34 | 0.009   |
| SLC25A29     | solute carrier family 25 (mitochondrial carnitine/acylcarnitine carrier), member 29 | 1.34 | 0.034   |
| DSG2         | desmoglein 2                                                                        | 1.34 | 0.026   |



| Gene Symbol | Gene Description                                                             | FC   | p-value |
|-------------|------------------------------------------------------------------------------|------|---------|
| KITLG       | KIT ligand                                                                   | 1.34 | 0.020   |
| UVRAG       | UV radiation resistance associated                                           | 1.34 | 0.049   |
| CXADR       | coxsackie virus and adenovirus receptor                                      | 1.34 | 0.023   |
| TRIM13      | tripartite motif containing 13                                               | 1.34 | 0.000   |
| MTPN        | myotrophin                                                                   | 1.33 | 0.008   |
| ANXA5       | annexin A5                                                                   | 1.33 | 0.035   |
| MTFR2       | mitochondrial fission regulator 2                                            | 1.33 | 0.036   |
| IDH3A       | isocitrate dehydrogenase 3 (NAD+) alpha                                      | 1.33 | 0.029   |
| DNA2        | DNA replication helicase/nuclease 2                                          | 1.33 | 0.029   |
| ABCB1LB     | ATP-binding cassette, sub-family B (MDR/TAP), member 1-like B                | 1.33 | 0.041   |
| COMT        | catechol-O-methyltransferase                                                 | 1.33 | 0.032   |
| C4H4ORF29   | chromosome 4 open reading frame, human C4orf29                               | 1.33 | 0.026   |
| PKHD1       | polycystic kidney and hepatic disease 1 (autosomal recessive)                | 1.33 | 0.032   |
| DYNLRB2     | dynein, light chain, roadblock-type 2                                        | 1.32 | 0.010   |
| HPGDS       | hematopoietic prostaglandin D synthase                                       | 1.32 | 0.006   |
| MLXIP       | MLX interacting protein                                                      | 1.32 | 0.033   |
| DCAF5       | DDB1 and CUL4 associated factor 5                                            | 1.32 | 0.035   |
| PRKAR2A     | protein kinase, cAMP-dependent, regulatory, type II, alpha                   | 1.32 | 0.003   |
| RRAGB       | Ras-related GTP binding B                                                    | 1.31 | 0.032   |
| TMEM229B    | transmembrane protein 229B                                                   | 1.31 | 0.026   |
| FANCD2      | Fanconi anemia, complementation group D2                                     | 1.31 | 0.030   |
| STARD3NL    | STARD3 N-terminal like                                                       | 1.31 | 0.020   |
| LBR         | lamin B receptor                                                             | 1.31 | 0.012   |
| CAP1        | CAP, adenylate cyclase-associated protein 1 (yeast)                          | 1.31 | 0.026   |
| DENND1B     | DENN/MADD domain containing 1B                                               | 1.30 | 0.018   |
| ALDH1A1     | aldehyde dehydrogenase 1 family, member A1                                   | 1.30 | 0.024   |
| OAZ1        | ornithine decarboxylase antizyme 1                                           | 1.30 | 0.023   |
| TMBIM4      | transmembrane BAX inhibitor motif containing 4 [Source:EntrezGene;Acc:51643] | 1.30 | 0.033   |
| CRYBG3      | beta-gamma crystallin domain containing 3                                    | 1.30 | 0.037   |

<sup>1</sup> Microarray fold changes were calculated from n = 6 animals/group.
